# Supplementary material for: Aberrant Cerebral Blood Flow in Response to Hunger and Satiety in Women Remitted from Anorexia Nervosa
Source: Front Nutr. 2017 Jul 19;4:32. doi: 10.3389/fnut.2017.00032 (PMC5515860; doi:10.3389/fnut.2017.00032)
Supplement: Supplementary file 1 [file Data_Sheet_1.pdf]

## SUPPLEMENTAL MATERIAL

Hypothalamus

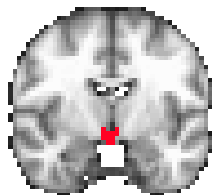

Y=6

Ventral Striatum

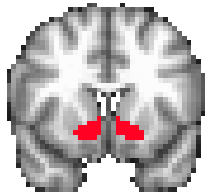

Y=-12

vmPFC

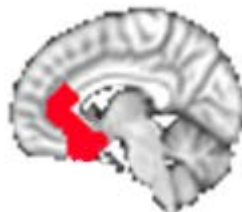

X=6

Insula

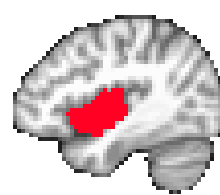

X=39

**Supplementary Figure 1.** Illustration of regions of interest for the examination of homeostatic regulation included the bilateral hypothalamus, ventral striatum, vmPFC (subgenual and rostral ACC), and insula derived from the Harvard-Oxford MNI Atlas.

| Characteristic                         | CW (N=16)                    | RAN (N=21)                   | F or $\chi^2$           | p      | Cohen's d |
|----------------------------------------|------------------------------|------------------------------|-------------------------|--------|-----------|
| <b>Lifetime Diagnosis (n)</b>          |                              |                              |                         |        |           |
| Major Depressive Disorder              | 0                            | 14                           | $\chi^2(1, N=37)=17.16$ | <0.001 |           |
| Obsessive Compulsive Disorder          | 0                            | 4                            | $\chi^2(2, N=37)=3.41$  | 0.12   |           |
| Any anxiety disorder                   | 0                            | 7                            | $\chi^2(2, N=37)=6.58$  | 0.01   |           |
| Any alcohol                            | 0                            | 3                            | $\chi^2(2, N=37)=2.49$  | 0.24   |           |
| WCST Perseverative Errors <sup>a</sup> | 7.5 $\pm$ 3.8 [4.0-19.0]     | 14.9 $\pm$ 2.3 [4.0-45.0]    | t(33)=2.06              | 0.01   | 0.59      |
| WCST Categories Completed <sup>a</sup> | 6.0 $\pm$ 0.0 [6.0-6.0]      | 5.0 $\pm$ 0.4 [0.0-6.0]      | t(33)=2.04              | 0.05   | 1.05      |
| WASI IQ <sup>b</sup>                   | 114.8 $\pm$ 2.8 [96.0-136.0] | 111.9 $\pm$ 3.0 [85.0-133.0] | t(34)=0.67              | 0.51   | 0.23      |
| YBOCS Current Total                    | 0.0 $\pm$ 0.0 [0.0-0.0]      | 0.3 $\pm$ 0.2 [0.0-3.0]      | t(35)=1.55              | 0.13   | 0.83      |
| YBOCS Whole Lifetime Total             | 0.0 $\pm$ 0.0 [0.0-0.0]      | 8.3 $\pm$ 2.0 [0.0-32.0]     | t(35)=3.10              | 0.004  | 1.54      |

**Supplementary Table 1.** Participant neurocognitive and psychiatric characteristics. Entries are of the form mean  $\pm$  SEM [min-max]. Statistical comparisons were either by means of Welch t-tests or  $\chi^2$  test for equality of proportions. CW: healthy comparison women; RAN: women remitted from anorexia nervosa; RBN: women remitted from bulimia nervosa; WCST: Wisconsin Card Sorting Task; WASI: Wechsler Adult Intelligence Scale; YBOCS: Yale-Brown Obsessive-Compulsive Scale. Any anxiety disorder defined as having had at least one prior episode of panic disorder, phobia, post-traumatic stress disorder, generalized anxiety disorder, or any anxiety disorder NOS. Any alcohol defined as any history of abuse or dependent per DSM-IV criteria. Note: <sup>a</sup>one CW and 1 RAN did not complete this assessment; <sup>b</sup>one CW did not complete this assessment.

| Predictor         | Hunger  |      | TCI Harm  |     | STAI State |     | STAI Trait |     | BDI  |     | Age  |     | Current BMI |      | Lowest BMI |      |
|-------------------|---------|------|-----------|-----|------------|-----|------------|-----|------|-----|------|-----|-------------|------|------------|------|
|                   | Ratings |      | Avoidance |     | Anxiety    |     | Anxiety    |     |      |     |      |     |             |      |            |      |
|                   | t       | p    | t         | p   | t          | p   | t          | p   | t    | p   | t    | p   | t           | p    | t          | p    |
| RAN               |         |      |           |     |            |     |            |     |      |     |      |     |             |      |            |      |
| VST CBF Hungry    | -.30    | .77  | .30       | .76 | -1.2       | .24 | -.45       | .65 | .30  | .76 | .02  | .99 | .10         | .92  | -1.0       | .29  |
| VMPFC CBF Hungry  | -.78    | .44  | -.24      | .81 | -1.3       | .20 | -.15       | .88 | -.35 | .72 | .18  | .85 | -.64        | .52  | -2.87      | .004 |
| Insula CBF Hungry | -2.7    | .008 | 1.3       | .20 | .58        | .56 | 1.9        | .05 | -.34 | .73 | .21  | .83 | .44         | .66  | .33        | .74  |
| VST CBF Fed       | -1.3    | .20  | -.53      | .60 | -1.3       | .19 | -1.6       | .11 | .04  | .97 | .30  | .76 | 1.3         | .19  | -1.3       | .21  |
| VMPFC CBF Fed     | -.85    | .40  | .32       | .75 | -.46       | .64 | -.92       | .36 | -.04 | .97 | .74  | .46 | 2.1         | .04  | -1.8       | .07  |
| Insula CBF Fed    | -.04    | .97  | .35       | .73 | -1.8       | .07 | -.36       | .72 | -1.1 | .26 | .32  | .74 | .71         | .48  | -.23       | .82  |
| CW                |         |      |           |     |            |     |            |     |      |     |      |     |             |      |            |      |
| VST CBF Hungry    | .74     | .46  | .59       | .55 | -.32       | .75 | .08        | .93 | .73  | .47 | -.22 | .78 | 1.5         | .13  | --         | --   |
| VMPFC CBF Hungry  | 1.9     | .06  | 1.1       | .28 | 1.7        | .09 | .70        | .48 | .48  | .63 | -.25 | .80 | .83         | .40  | --         | --   |
| Insula CBF Hungry | -.28    | .78  | .17       | .86 | -.13       | .90 | .98        | .33 | -.06 | .94 | -.07 | .94 | 2.7         | .006 | --         | --   |
| VST CBF Fed       | -.01    | .99  | 1.0       | .31 | 1.0        | .30 | 1.3        | .20 | 1.1  | .29 | .18  | .86 | 1.1         | .26  | --         | --   |
| VMPFC CBF Fed     | -.22    | .83  | .84       | .40 | 1.1        | .29 | 1.4        | .17 | .29  | .77 | -2.2 | .03 | .69         | .49  | --         | --   |
| Insula CBF Fed    | .20     | .84  | .37       | .72 | .21        | .84 | 2.4        | .02 | .24  | .81 | -.13 | .20 | 1.8         | .08  | --         | --   |

**Supplementary Table 2.** Associations between CBF and hunger ratings and clinical variables resulting from robust regression. TCI = Temperament and Character Inventory; STAI = Spielberger State Trait Anxiety Inventory; BDI = Beck Depression Inventory; BMI = body mass index; RAN = remitted anorexia nervosa; CW = control women; VST = ventral striatum; VMPFC = ventromedial prefrontal cortex; CBF = cerebral

blood flow. Significance after Bonferroni correction for multiple comparisons determined at  $p < 0.008$  for hunger ratings (a priori) and  $p < 0.001$  for clinical variables (exploratory).
