# Supplementary material for: Aberrant Cerebral Blood Flow in Response to Hunger and Satiety in Women Remitted from Anorexia Nervosa
Source: PubMed Central journal article supplement (PMC5515860; doi:10.3389/fnut.2017.00032), 2017-07-19
Supplement: table_1.pdf [file table_1.pdf]

| Characteristic                         | CW (N=16)                | RAN (N=21)               | F or $\chi^2$          | p      | Cohen's <i>d</i> |
|----------------------------------------|--------------------------|--------------------------|------------------------|--------|------------------|
| <b>Lifetime Diagnosis (n)</b>          |                          |                          |                        |        |                  |
| Major Depressive Disorder              | 0                        | 14                       | $\chi^2(1,N=37)=17.16$ | <0.001 |                  |
| Obsessive Compulsive Disorder          | 0                        | 4                        | $\chi^2(2,N=37)=3.41$  | 0.12   |                  |
| Any anxiety disorder                   | 0                        | 7                        | $\chi^2(2,N=37)=6.58$  | 0.01   |                  |
| Any alcohol                            | 0                        | 3                        | $\chi^2(2,N=37)=2.49$  | 0.24   |                  |
| WCST Perseverative Errors <sup>a</sup> | 7.5 ± 3.8 [4.0-19.0]     | 14.9 ± 2.3 [4.0-45.0]    | t(33)=2.06             | 0.01   | 0.59             |
| WCST Categories Completed <sup>a</sup> | 6.0 ± 0.0 [6.0-6.0]      | 5.0 ± 0.4 [0.0-6.0]      | t(33)=2.04             | 0.05   | 1.05             |
| WASI IQ <sup>b</sup>                   | 114.8 ± 2.8 [96.0-136.0] | 111.9 ± 3.0 [85.0-133.0] | t(34)=0.67             | 0.51   | 0.23             |
| YBOCS Current Total                    | 0.0 ± 0.0 [0.0-0.0]      | 0.3 ± 0.2 [0.0-3.0]      | t(35)=1.55             | 0.13   | 0.83             |
| YBOCS Whole Lifetime Total             | 0.0 ± 0.0 [0.0-0.0]      | 8.3 ± 2.0 [0.0-32.0]     | t(35)=3.10             | 0.004  | 1.54             |

**Supplementary Table 1.** Participant neurocognitive and psychiatric characteristics. Entries are of the form mean +/- SEM [min-max]. Statistical comparisons were either by means of Welch t-tests or  $\chi^2$  test for equality of proportions. CW: healthy comparison women; RAN: women remitted from anorexia nervosa; RBN: women remitted from bulimia nervosa; WCST: Wisconsin Card Sorting Task; WASI: Wechsler Adult Intelligence Scale; YBOCS: Yale-Brown Obsessive-Compulsive Scale. Any anxiety disorder defined as having had at least one prior episode of panic disorder, phobia, post-traumatic stress disorder, generalized anxiety disorder, or any anxiety disorder NOS. Any alcohol defined as any history of abuse or dependent per DSM-IV criteria. Note: <sup>a</sup>one CW and 1 RAN did not complete this assessment; <sup>b</sup>one CW did not complete this assessment.
