# Supplementary material for: Aberrant Cerebral Blood Flow in Response to Hunger and Satiety in Women Remitted from Anorexia Nervosa
Source: PubMed Central journal article supplement (PMC5515860; doi:10.3389/fnut.2017.00032), 2017-07-19
Supplement: table_2.pdf [file table_2.pdf]

| ROI              | Subregion                                   | R/L | Volume ( $\mu\text{L}$ ) | RL  | AP  | IS | Peak t | p      | Cohen's d <sup>±</sup> |
|------------------|---------------------------------------------|-----|--------------------------|-----|-----|----|--------|--------|------------------------|
| Ventral Striatum |                                             | R   | 108                      | -12 | -21 | -6 | 3.86   | <0.001 | 0.55                   |
| vmPFC            | Subgenual ACC, adjacent to the caudate head | R   | 108                      | -3  | -9  | -3 | 3.70   | <0.001 | 0.22                   |
| *Insula          | Posterior Insula                            | L   | 54                       | 30  | 24  | 6  | 3.98   | <0.001 | 0.14                   |

**Table 2.** T-test results within regions of interest demonstrating a group difference in the Hungry – Fed contrast for CBF. Small volume correction was determined with Monte-Carlo simulations (via AFNI's 3dClustSim) to guard against false positives. Coordinates are reported as the center of mass and are presented in RAI format. **±Cohen's d values are presented for the group difference in CBF in the Hungry – Fed contrast averaged across each anatomical ROI to avoid the possibility of over-inflation by restricting analysis to significant ("non-independent") clusters (see 94).** \*Insula cluster did not meet cluster-size threshold of 81  $\mu\text{l}$  to control for multiple comparisons, despite a large effect size. RL: right-left direction; AP: anterior-posterior direction; IS: inferior-superior direction; L: left; R: right; CW: healthy comparison women; RAN: women remitted from anorexia nervosa.
